# Supplementary material
Source: PubMed Central journal article supplement (PMC2478736)
Supplement: 97320630002348S1.pdf [file 97320630002348S1.pdf]

### Supplementary material

| Gene                      | Chromosome | Early-onset | Late-onset |
|---------------------------|------------|-------------|------------|
| Amyloid precursor protein | 21         | Ages 40-60  | No         |
| Presenilin I              | 14         | Ages 30-50  | No         |
| Presenilin II             | 1          | Ages 30-65  | Rare       |
| Apolipoprotein-E          | 19         | Rare        | Ages 60-75 |

**Table 1:** Genes Related to Alzheimer's disease [65].

| S.no. | Protein name                                                                                                 | Gen Id   | Gene name |
|-------|--------------------------------------------------------------------------------------------------------------|----------|-----------|
| 1     | Calsenilin                                                                                                   | 604662   | CSEN      |
| 2     | HIV-1rev-bindingprotein                                                                                      | 600862   | HRB       |
| 3     | HIV-1tat stimulatory factor1                                                                                 | 300346   | HTATSF1   |
| 4     | HIV type1 expression1                                                                                        | 143055   | HIVE1     |
| 5     | presenilin-associated rhomboid-like protein                                                                  | 607858   | PSARL     |
| 6     | ribosomal protein l3                                                                                         | 604163   | RPL3      |
| 7     | tar rna-binding protein 1                                                                                    | 605052   | TARBP1    |
| 8     | amyloid beta a4 precursor protein-binding, family b, member 2                                                | 602710   | APBB2     |
| 9     | amyloid beta a4 precursor protein-binding, family b, member 1                                                | 602709   | APBB1     |
| 10    | amyloid beta a4 precursor-like protein 2; aplp2"                                                             | 104776   | APLP2     |
| 11    | amyloid beta precursor protein-binding protein 2                                                             | 605324   | APPBP2    |
| 12    | chemokine, cc motif, ligand                                                                                  | 187011   | CCL5      |
| 13    | fe65-like 2                                                                                                  | 602711   | APBB3     |
| 14    | HIV-1 tat-interacting protein 30-kd                                                                          | 605628   | HTATIP2   |
| 15    | HIV-1tat-interacting protein                                                                                 | 601409   | HTATIP    |
| 16    | presenilin 1                                                                                                 | 104311   | PSEN1     |
| 17    | presenilin 2                                                                                                 | 600759   | PSEN2     |
| 18    | LOC442267, similar to T-complex protein 1, eta subunit (TCP-1-eta) (CCT-eta) (HIV-1 Nef interacting protein) | 442267   | LOC442267 |
| 19    | HIV-1 rev binding protein 2                                                                                  | 11103    | HRB2      |
| 20    | HIV-1 induced protein HIN-1, KIAA1046                                                                        | 54726    | HSHIN1    |
| 21    | LOC145414 similar to ribosomal protein L3; 60S ribosomal protein L3; HIV-1 TAR RNA-binding protein B         | 30583118 | LOC145414 |

**Table 2:** Dementia associated genes in NCBI, OMIM.

| Name      | Additional description/function                                                                                                                            | Chromosome | Location   | Distance (bp)   |
|-----------|------------------------------------------------------------------------------------------------------------------------------------------------------------|------------|------------|-----------------|
| APBA1     | 9q13-q21.1 amyloid beta (A4) precursor protein-binding, family A, member 1 (X11)                                                                           | 9          | 9q13-q21.2 | 69.27M - 69.53M |
| APPL1     | amyloid beta (A4) precursor protein-like 1                                                                                                                 |            | 9q31-qter  | 57.24M-57.28M   |
| APBB1IP   | amyloid beta (A4) precursor protein-binding, family B, member 1 interacting protein                                                                        | 10         | 10p12.1    | 26.76M-26.89M   |
| LOC387643 | similar to amyloid beta (A4) precursor protein-binding, family B, member 1 interacting protein; proline-rich protein 73; Rap1-interacting adaptor molecule |            | 10p12.1    | 26.91M-26.98M   |
| C10ORF51  | similar to amyloid beta (A4) precursor protein-binding, family B, member 1 interacting protein; proline-rich protein 73; Rap1-interacting adaptor molecule |            | 10q21.1    |                 |
| APBA2     | amyloid beta (A4) precursor protein-binding, family A, member 2 (X11-like)                                                                                 | 15         | 15q11-q12  | 27.00M-27.19M   |
| LOC390566 | similar to amyloid beta A4 precursor protein-binding, family                                                                                               |            | 15q14      | 32.48M-32.49M   |

|           |                                                                                                                                                                                                                                                                                                                                                                                                                                                       |      |           |                  |
|-----------|-------------------------------------------------------------------------------------------------------------------------------------------------------------------------------------------------------------------------------------------------------------------------------------------------------------------------------------------------------------------------------------------------------------------------------------------------------|------|-----------|------------------|
| LOC390569 | A, member 2; neuronal munc18-1-interacting protein 2; X11-like protein; phosphotyrosine-binding/-interacting domain (PTB)-bearing protein; neuron-specific X11L protein; adapter protein X<br>similar to amyloid beta A4 precursor protein-binding, family A, member 2; neuronal munc18-1-interacting protein 2; X11-like protein; phosphotyrosine-binding/-interacting domain (PTB)-bearing protein; neuron-specific X11L protein; adapter protein X |      | 15q14     | 32.635M-32.636M  |
| APPBP1    | amyloid beta precursor protein binding protein 1, 59kDa                                                                                                                                                                                                                                                                                                                                                                                               | 16   | 16q22     | 65.39M-65.42M    |
| APBA3     | 19p13.3 amyloid beta (A4) precursor protein-binding, family A, member 3 (X11-like 2)                                                                                                                                                                                                                                                                                                                                                                  | 19** | 19p13.3   | 37.01M-37.126M   |
| APBA2BP   | 20q11.22 amyloid beta (A4) precursor protein-binding, family A, member 2 binding protein                                                                                                                                                                                                                                                                                                                                                              | 20   | 20.q11.22 | 31.7M-31.72M     |
| APP       | 21q21.3 amyloid beta (A4) precursor protein (protease nexin-II, Alzheimer disease)                                                                                                                                                                                                                                                                                                                                                                    | 21   | 21q21.3   | 26.17M-26.46M    |
| PEN2      | 19q13.13 presenilin enhancer 2                                                                                                                                                                                                                                                                                                                                                                                                                        | 19** | 19q13.13  | 40.928M-40.929M  |
| APOE      | 19q13.2 Apo-lipoprotein E (late onset AD)                                                                                                                                                                                                                                                                                                                                                                                                             | 19** | 19q13.2   | 50.100M-50.1004M |

**Table 3:** Genes found in Alzheimer's disease and their particular location in the human genome excluding those that shared loci with HIV-1-associated genes. Note that chromosome 19 has genes from Amyloid B, presenilin, and Apolipoprotein groups. \*Data obtained from NCBI Entrez Genome [18, 41, 53]. Alzheimer's disease related genes with their corresponding proteins. \*\*\*blank = no information was obtained

| Amyloid $\beta$ related genes                                                       |        |                 |            | HIV-1 related genes |           |                                                                                        |
|-------------------------------------------------------------------------------------|--------|-----------------|------------|---------------------|-----------|----------------------------------------------------------------------------------------|
| Location/Description                                                                | Symbol | Distance (bp)   | Chromosome | Distance (bp)       | Symbol    | Location/Description                                                                   |
| 4p14 amyloid beta (A4) precursor protein-binding, family B, member 2 (Fe65-like)    | APBB2  | 41.05M-41.06    | 4          | 14.645M-14.641M     | HSHIN1    | 4q31.21 HIV-1 induced protein HIN-1                                                    |
| 5q31 amyloid beta (A4) precursor protein-binding, family B, member 3                | APBB3  | 13.991M-13.992M | 5          | 92.251M-92.252M     | LOC391810 | 5q14.3 similar CCT7                                                                    |
| <b>11p15</b> amyloid beta (A4) precursor protein-binding, family B, member 1 (Fe65) | APBB1  | 63.72M-63.97M   | 11         | 20.341M-20.361M     | HTATIP2   | <b>11p15.1</b> HIV-1 Tat interactive protein 2, 30kDa                                  |
| 11q24 amyloid beta (A4) precursor-like protein 2                                    | APLP2  | 129.4M-129.5M   |            | 65.23M-65.24M       | HTATIP    | 11q13 HIV-1 Tat interactive protein, 60kDa                                             |
| 17q21-q23 amyloid beta precursor protein (cytoplasmic tail) binding protein 2       | APPBP2 | 55.87M-55.95M   | 17         | 31.22-31.23M        | CCL5      | 17q11.2-q12 HIV-1 disease, delayed progression of; HIV-1 disease, rapid progression of |

**Table 4:** Amyloid  $\beta$  and HIV-1 associated dementia related genes with their locations in the human genome. \*Data gathered from NCBI Entrez Genome [49, 53, 60]. \*\*Bold text highlights the proximity of these genes to one another on the chromosome

| Presenilin related genes                         |         |                 |            | HIV-1 related genes |        |                                                                      |
|--------------------------------------------------|---------|-----------------|------------|---------------------|--------|----------------------------------------------------------------------|
| Location/Description                             | Symbol  | Distance (bp)   | Chromosome | Distance (bp)       | Symbol | Location/Description                                                 |
| <b>1q31-q42</b> presenilin (Alzheimer disease 4) | 2 PSEN2 | 22.336M-22.339M | 1          | 230.8M-230.9M       | TARBP1 | <b>1q42.3</b> TAR (HIV) RNA binding protein 1                        |
|                                                  |         |                 |            | 203.32M-203.33M     | IL10   | <b>1q31-q32</b> HIV-1, susceptibility to; Graft-versus-host disease, |

|                                                                             |            |                 |    |                |            |                                                                                                    |                    |
|-----------------------------------------------------------------------------|------------|-----------------|----|----------------|------------|----------------------------------------------------------------------------------------------------|--------------------|
| 2q21.1 calnenilin, presenilin binding protein, EF hand transcription factor | CSEN       | 95.38M-95.47M   | 2  | 228.16M-22824M | HRB        | 2q36.3 HIV-1 Rev binding protein                                                                   | protection against |
| 3q27.3 presenilin associated, rhomboid-like                                 | PSARL      | 185.02M-185.08M | 3  | 46.38M-46.39M  | CCR5       | 3p21 HIV infection, susceptibility/resistance to                                                   |                    |
| 14q24.3 presenilin (Alzheimer disease 3)                                    | 1 PSEN 1 † | 72.67M-72.75    | 14 | 56.3M-56.5M    | LOC14541 4 | 14q22.3 similar to ribosomal protein L3; 60S ribosomal protein L3; HIV-1 TAR RNA-binding protein B |                    |

**Table 5:** Presenilin and HIV-1 associated dementia related genes with their locations in the human genome. \*Data obtained from NCBI Entrez Genome [41, 49, 60]. \*\***Bold** text highlights the idea of these genes being close to one another on the chromosome. †Directly found to be associated with Alzheimer's disease.

| Chromosome | Distance (bp)     | Symbol    | Description                                                                                       |
|------------|-------------------|-----------|---------------------------------------------------------------------------------------------------|
| 6          | 150.293M-150.294M | LOC442267 | similar to T-complex protein 1, eta subunit (TCP-1-eta) (CCT-eta) (HIV-1 Nef interacting protein) |
|            | 2.966M-2.968M     | LOC401233 | similar to HIV TAT specific factor 1; cofactor required for Tat activation of HIV-1 transcription |
| 7          | 99.78M-99.80      | HRBL      | 7q22.1 HIV-1 Rev binding protein-like                                                             |
| 8          | 104.740M-104.741M | LOC442391 | similar to ribosomal protein L3; 60S ribosomal protein L3; HIV-1 TAR RNA-binding protein B        |
|            | 80.64M-80.65M     | TARBP2P   | 8q22-q24 TAR (HIV) RNA binding protein 2 pseudogene                                               |
| 12         | 74.1M-74.19M      | HRB2      | 12q21.1 HIV-1 rev binding protein 2                                                               |
|            |                   | HIVE1     | 12q11-q13.3 human immunodeficiency virus type 1 (HIV-1) expression (elevated) 1                   |
|            | 52.180M-52.186M   | TARBP2    | 12q12-q12 TAR (HIV) RNA binding protein 2                                                         |
| X          | 135.30M-135.32M   | HTATSF1   | Xq26.1-q27.2 HIV TAT specific factor 1                                                            |

**Table 6:** HIV-1 associated dementia genes found in human genome not structurally related to genes found with Alzheimer's disease. \*Data obtained from NCBI Entrez Genome [49, 60]. \*\*blank = no information was found.
